# Supplementary material
Source: PubMed Central journal article supplement (PMC6051301)
Supplement: mmc1.pdf [file mmc1.pdf]

**Biophysical Journal, Volume 114**

**Supplemental Information**

**The Starch Utilization System Assembles around Stationary Starch-Binding Proteins**

**Hannah H. Tuson, Matthew H. Foley, Nicole M. Koropatkin, and Julie S. Biteen**

## Supporting Information for:

### The Starch Utilization System Assembles Around Stationary Starch-Binding Proteins

#### Contents

- Figures S1 – S8
- Captions for Movies S1 – S2
- Tables S1 – S2
- Captions for Tables S3 – S4

#### SI Figures

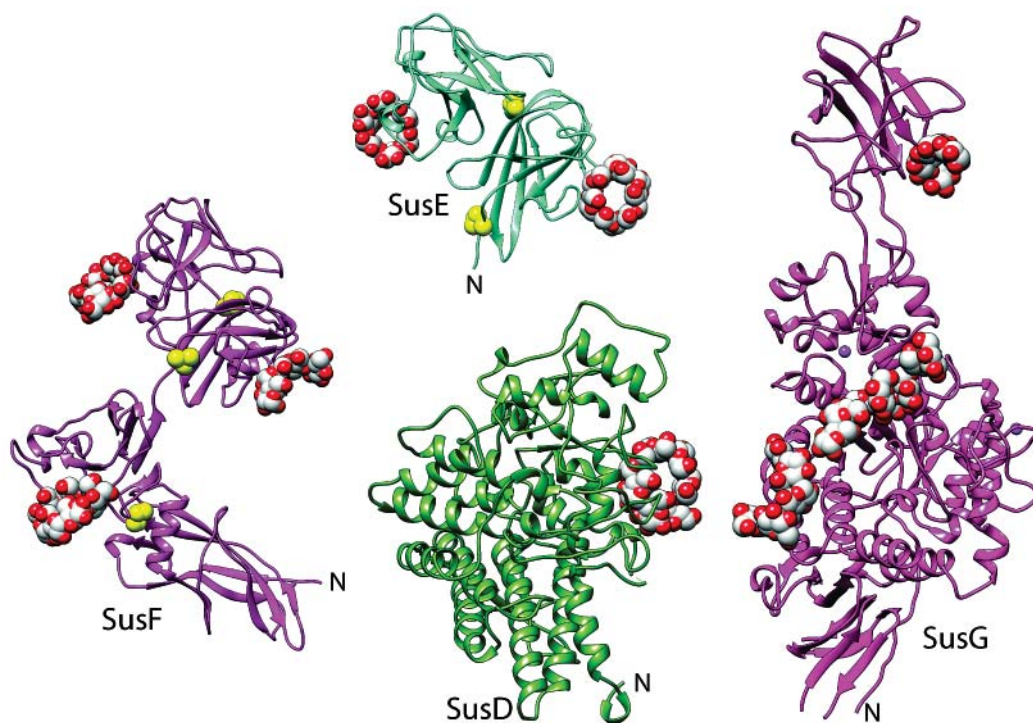

**Figure S1.** The crystal structures of SusD (PDB 3CK9), SusE (PDB 4FEM), SusF (PDB 4FE9), and SusG (PDB 3K8L). Co-crystallized maltooligosaccharides are shown with grey and red spheres, prolines in SusE and SusF are shown with yellow spheres. The 15 – 20 residue N-terminal linkers that connect each protein to the lipidated cysteine for tethering to the membrane were not resolved in the crystal structures. The N-terminal domain of SusE (residues 38-167) was not resolved in the crystal structure.

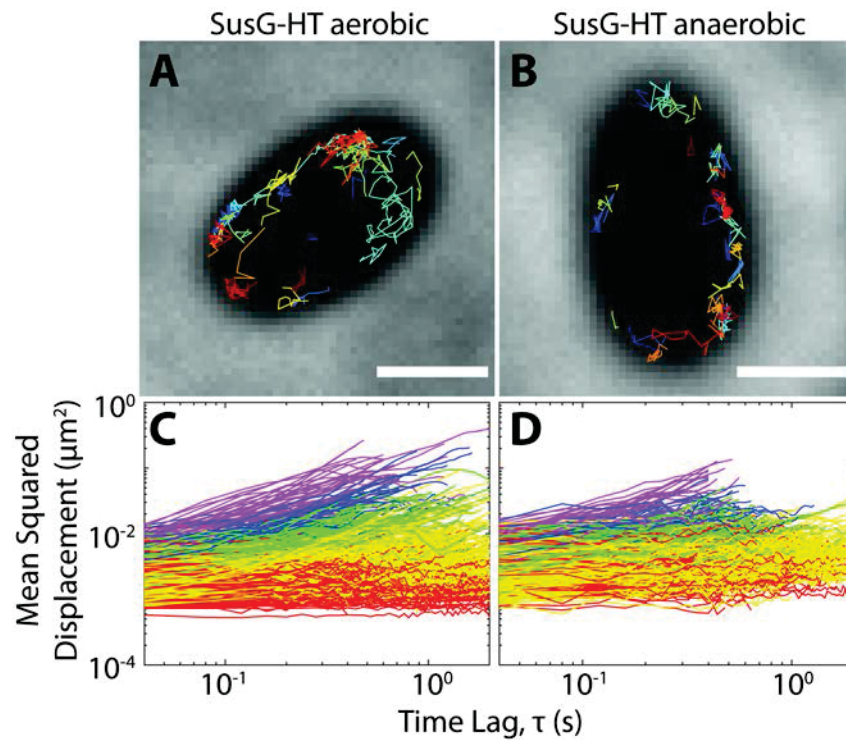

**Figure S2.** SusG-HT is mobile on the cell surface whether imaged under aerobic or anaerobic conditions. (A-B): each image shows a cell with 35 SusG-HT single-molecule tracks plotted in random colors. Scale bars = 1 μm. (C-D): the mean squared displacement of all tracks lasting longer than 20 frames is plotted for each protein fusion. Red: effective diffusion coefficient ( $D \leq 0.001 \mu\text{m}^2/\text{s}$ ); yellow:  $0.001 \mu\text{m}^2/\text{s} < D \leq 0.02 \mu\text{m}^2/\text{s}$ ; green:  $0.02 \mu\text{m}^2/\text{s} < D \leq 0.05 \mu\text{m}^2/\text{s}$ ; blue:  $0.05 \mu\text{m}^2/\text{s} < D \leq 0.1 \mu\text{m}^2/\text{s}$ ; purple:  $D > 0.1 \mu\text{m}^2/\text{s}$ .

### A SusG mutants in glucose

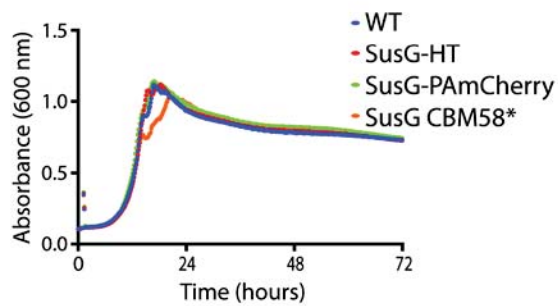

### B SusG mutants in amylopectin

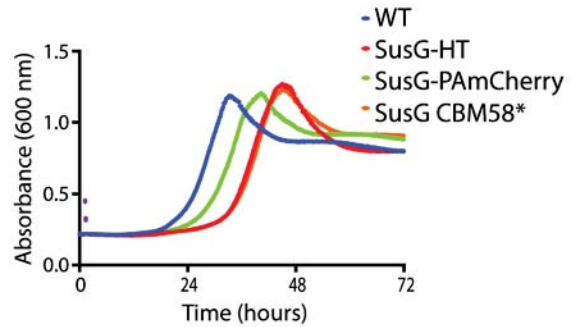

### C SusEF mutants in glucose

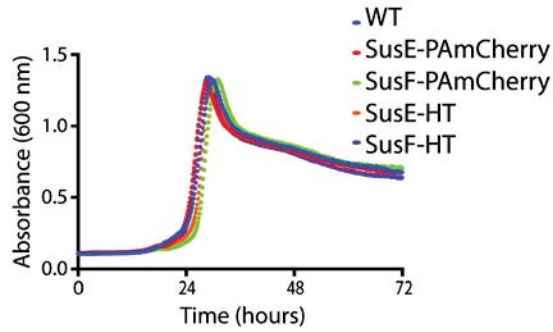

### D SusEF mutants in amylopectin

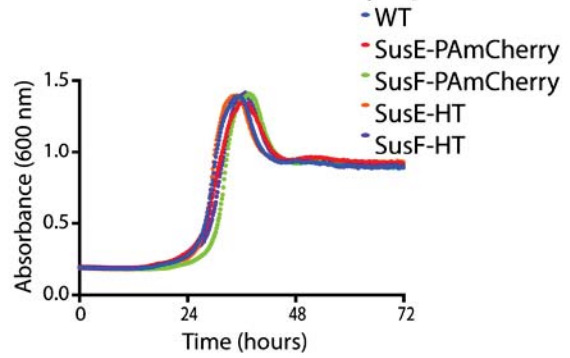

### E SusD mutants in glucose

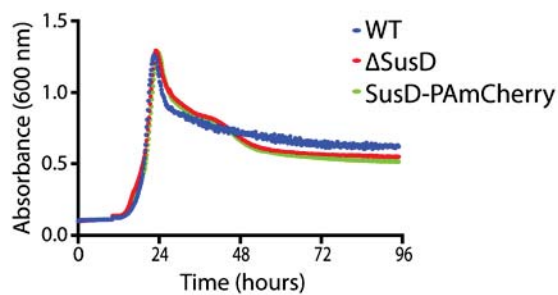

### F SusD mutants in amylopectin

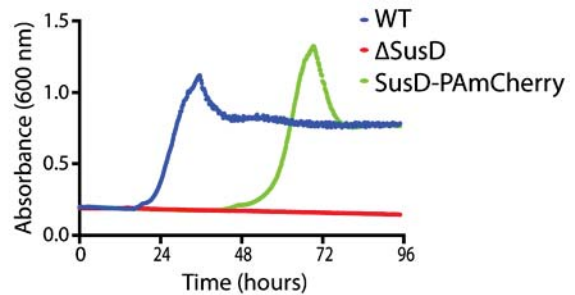

**Figure S3.** The fluorescently labeled SusG strains support growth on starch. Growth was measured in minimal medium containing 5 mg/mL glucose (*left*) or maize amylopectin (*right*) as the sole carbon source. (A, B): SusG-HT and SusG-PAmCherry were made by replacing the starch-binding CBM58 domain with HT or PAmCherry; CBM58 is not required for growth on starch as evidenced by the normal growth of SusG CBM58\*, which contains a starch-binding deficient version of CBM58. (C, D): SusE-HT, SusE-PAmCherry, SusF-HT, and SusF-PAmCherry are C-terminal protein fusions with 3-alanine linkers. (E, F): SusD-PAmCherry is a C-terminal protein fusion with a 20-alanine linker. The  $\Delta$ SusD strain was used as a negative control for growth on starch.

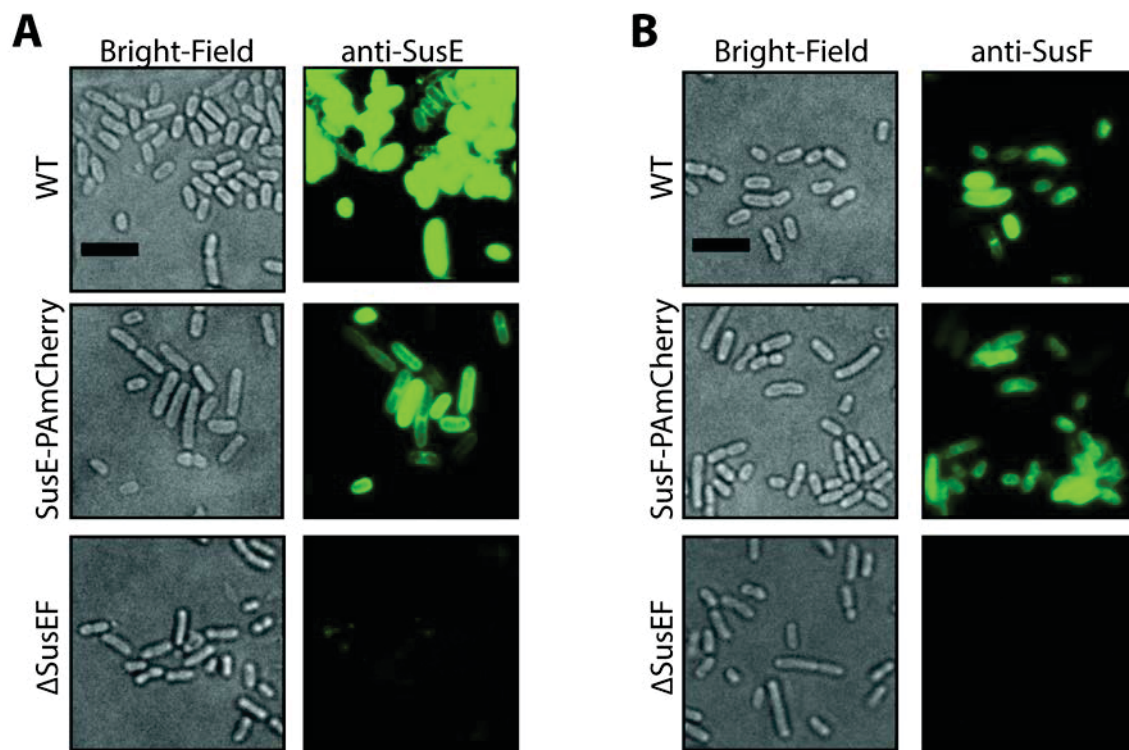

**Figure S4.** SusE-PAmCherry and SusF-PAmCherry visualized by immunofluorescence. Formalin-fixed, non-permeabilized *Bt* strains were grown in minimal media supplemented with maltose and labeled with custom rabbit polyclonal antibodies to SusE and SusF and then stained with a secondary antibody conjugated to Alexa Fluor 488 goat anti-rabbit IgG. The side-by-side panels display bright-field and fluorescence images for each strain labeled with (A) anti-SusE serum and (B) anti-SusF serum. Scale bars = 5  $\mu$ m.

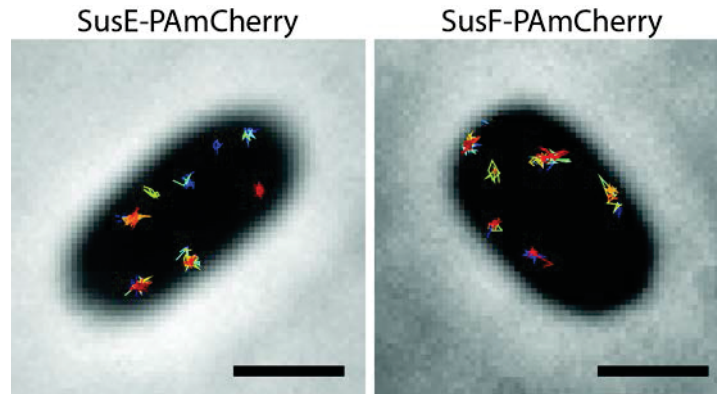

**Figure S5.** SusE-PAmCherry and SusF-PAmCherry remain highly confined when imaged for longer periods of time via time-lapse imaging. These figures show tracks of molecules that remain in place for 3 – 47 s, with one 40 ms frame acquired every 1 second. Each image shows a cell with 35 single-molecule tracks plotted in random colors. See also the corresponding Movies S1 and S2 of SusE-PAmCherry and SusF-PAmCherry, respectively. Scale bars = 1  $\mu\text{m}$ .

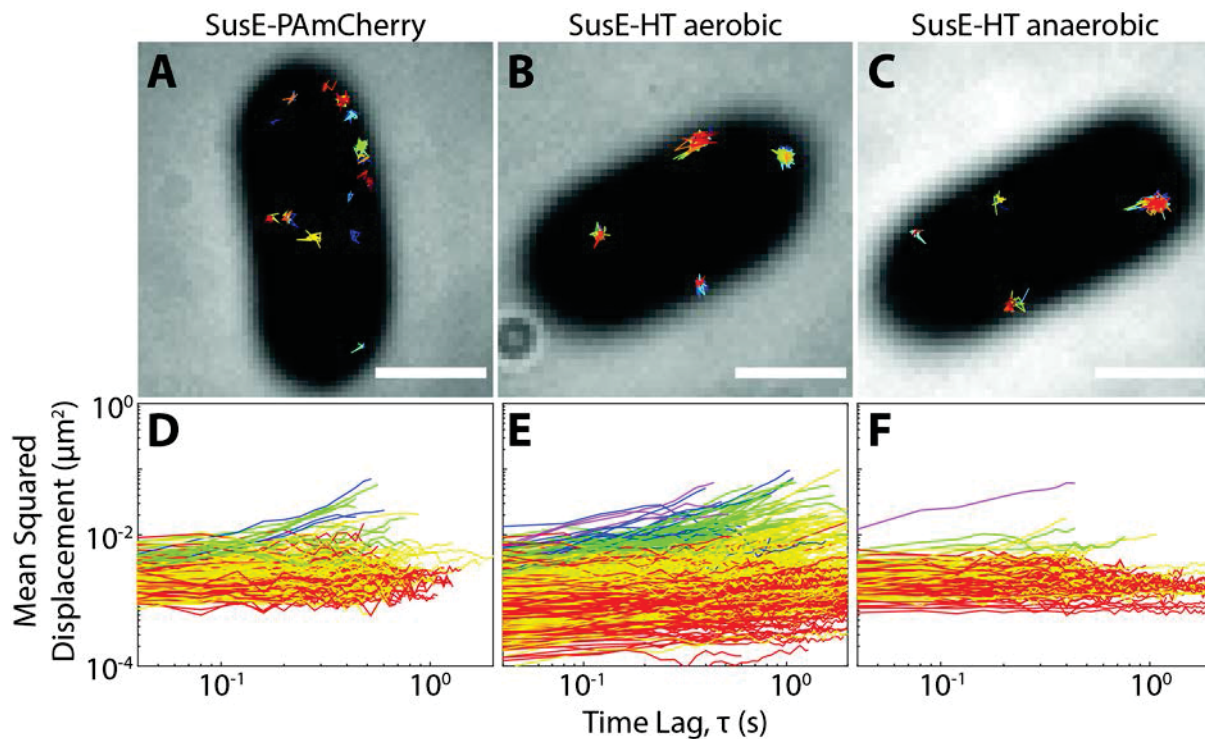

**Figure S6.** SusE-PAmCherry is highly confined when labeled with PAmCherry or HaloTag (HT) and whether imaged under aerobic or anaerobic conditions. (A-C): each image shows a cell with 35 single-molecule tracks plotted in random colors. Scale bars = 1  $\mu\text{m}$ . (D-F): the mean squared displacement of all tracks lasting longer than 20 frames is plotted for each protein fusion. Red: effective diffusion coefficient ( $D$ )  $\leq 0.001 \mu\text{m}^2/\text{s}$ ; yellow:  $0.001 \mu\text{m}^2/\text{s} < D \leq 0.02 \mu\text{m}^2/\text{s}$ ; green:  $0.02 \mu\text{m}^2/\text{s} < D \leq 0.05 \mu\text{m}^2/\text{s}$ ; blue:  $0.05 \mu\text{m}^2/\text{s} < D \leq 0.1 \mu\text{m}^2/\text{s}$ ; purple:  $D > 0.1 \mu\text{m}^2/\text{s}$ .

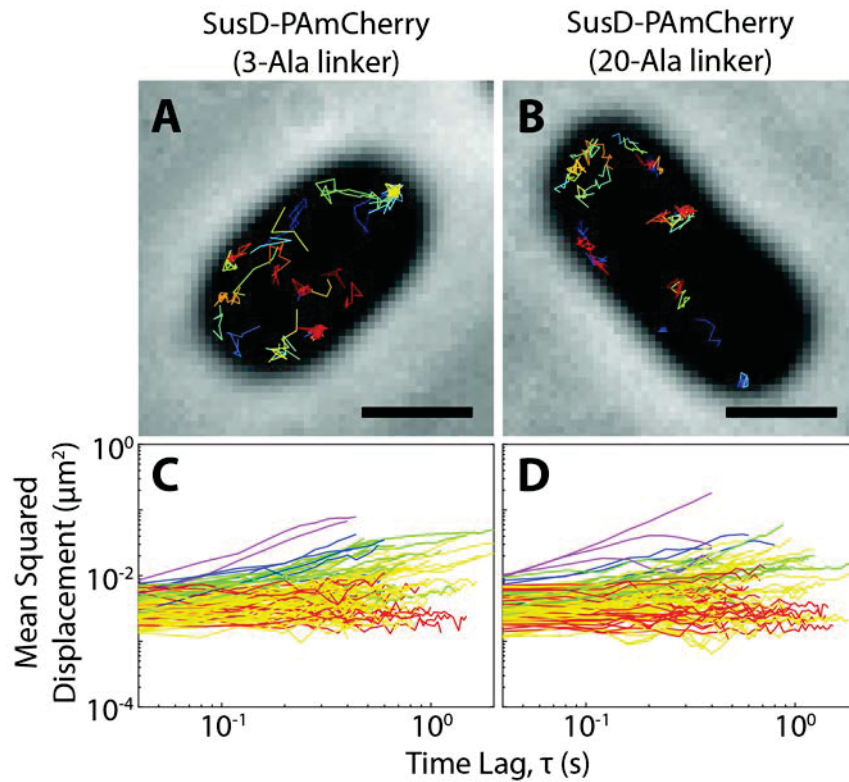

**Figure S7.** SusD-PAMCherry is mobile when the fluorescent label is attached via two different C-terminal linker lengths. (A, B): each image shows a cell with 35 single-molecule tracks plotted in random colors. Scale bars = 1  $\mu\text{m}$ . (C, D): the mean squared displacement of all tracks lasting longer than 20 frames is plotted for each protein fusion. Red: effective diffusion coefficient ( $D$ )  $\leq 0.001 \mu\text{m}^2/\text{s}$ ; yellow:  $0.001 \mu\text{m}^2/\text{s} < D \leq 0.02 \mu\text{m}^2/\text{s}$ ; green:  $0.02 \mu\text{m}^2/\text{s} < D \leq 0.05 \mu\text{m}^2/\text{s}$ ; blue:  $0.05 \mu\text{m}^2/\text{s} < D \leq 0.1 \mu\text{m}^2/\text{s}$ ; purple:  $D > 0.1 \mu\text{m}^2/\text{s}$ .

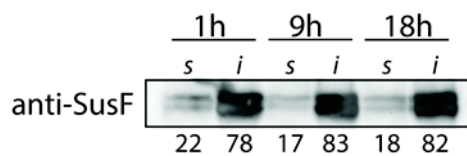

**Figure S8.** SusF remains insoluble during prolonged incubation with dodecyl maltoside. SusF is solubilized from the membrane as described in Methods, but incubated for 1, 9 or 19 h prior to centrifugation. The membrane-solubilized supernatant (s) and insoluble material (i) were run on a Western blot and SusF was detected with custom anti-SusF rabbit antibodies.

## SI Movies

**Movie S1.** SusE-PAmCherry molecules remain immobile in a *Bt* cell on the timescale of seconds. Movies are acquired via time-lapse imaging, with one 40 ms frame acquired every 1 second. Scale bar = 1  $\mu\text{m}$ .

**Movie S2.** SusF-PAmCherry molecules remain immobile in a *Bt* cell on the timescale of seconds. Movies are acquired via time-lapse imaging, with one 40 ms frame acquired every 1 second. Scale bar = 1  $\mu\text{m}$ .

## SI Tables

**Table S1.** Bacterial strains used in this study

| Strain Name            | Organism  | Mutations                                   | Notes     |
|------------------------|-----------|---------------------------------------------|-----------|
| <i>Bt</i> $\Delta tdk$ | <i>Bt</i> | $\Delta tdk$                                | Ref. (13) |
| <i>Bt</i> SusG-HT      | <i>Bt</i> | SusG-HT                                     | Ref. (21) |
| MF001                  | <i>Bt</i> | SusG-PamCherry, $\Delta tdk$                |           |
| MF002                  | <i>Bt</i> | SusE-HT, $\Delta tdk$                       |           |
| MF003                  | <i>Bt</i> | SusE-PamCherry, $\Delta tdk$                |           |
| MF004                  | <i>Bt</i> | SusE-PAmCherry $\Delta susC$ , $\Delta tdk$ |           |
| MF005                  | <i>Bt</i> | SusE-PAmCherry $\Delta susD$ , $\Delta tdk$ |           |
| MF006                  | <i>Bt</i> | SusE-PAmCherry $\Delta cps$                 |           |
| MF007                  | <i>Bt</i> | SusF-HT, $\Delta tdk$                       |           |
| MF008                  | <i>Bt</i> | SusF-PAmCherry $\Delta susC$ , $\Delta tdk$ |           |
| MF009                  | <i>Bt</i> | SusF-PAmCherry $\Delta susD$ , $\Delta tdk$ |           |
| MF010                  | <i>Bt</i> | SusF-PAmCherry $\Delta cps$ , $\Delta tdk$  |           |



**Table S2.** Oligonucleotides used in this study

| Primer Name                | Sequence (5'-3')                                              | Used for Construction of         |
|----------------------------|---------------------------------------------------------------|----------------------------------|
| SusD pAMCherry Up nest     | GTGCAGACAAAGCCGCAAC                                           | SusD C-terminal PAmCherry fusion |
| SusD pAMCherry UpF Sal1    | GCATGTCGACCTGGTTGTGGTACTCGTGTAG                               | SusD C-terminal PAmCherry fusion |
| SusD pAMCherry UpR         | GCGCATGAACTCCTTAATGATGGCTGCTGCTTTATAGCCTTCA<br>TTTTGTG        | SusD C-terminal PAmCherry fusion |
| pAMCherry SusD F           | CACAAAATGAAGGCTATAAAGCAGCAGCAGCCATCATTAAAGGAG<br>TTCATGCGC    | SusD C-terminal PAmCherry fusion |
| pAMCherry SusD R           | CTTTTATATAAGGATGAACTCTTGGTACTTGTACAGCTCGTCCAT<br>G            | SusD C-terminal PAmCherry fusion |
| SusD pAMCherry DownF       | CATGGACGAGCTGTACAAGTAACCAAGAGTTCATCCTTATATAAA<br>AG           | SusD C-terminal PAmCherry fusion |
| SusD pAMCherry DownR Xba1  | GCATTCTAGATAACCGTCACGCGGTTGTGC                                | SusD C-terminal PAmCherry fusion |
| SusD pAMCherry Down nest   | CCGCTTGCAGTCATGGCAGG                                          | SusD C-terminal PAmCherry fusion |
| SusE pAMCherry Up nest     | TGCCCAAAGTGTAGAAGTCA                                          | SusE C-terminal PAmCherry fusion |
| SusE pAMCherry UpF Sal1    | GCATGTCGACGTAGCTGTATATATCCGCTG                                | SusE C-terminal PAmCherry fusion |
| SusE pAMCherry UpR         | GCGCATGAACTCCTTAATGATGGCTGCTGCTTCTTTCTCT<br>GTACC             | SusE C-terminal PAmCherry fusion |
| pAMCherry SusE F           | GGTACAGGAGAAAAGAAGGCAGCAGCAGCCATCATTAAAGGAGT<br>TCATGCGC      | SusE C-terminal PAmCherry fusion |
| pAMCherry SusE R           | GAATCGTTCTTTTAAAGTTAATTACTTGTACAGCTCGTCCATG                   | SusE C-terminal PAmCherry fusion |
| SusE pAMCherry DownF       | CATGGACGAGCTGTACAAGTAATTAACCTTAAAAAGAACGATTC                  | SusE C-terminal PAmCherry fusion |
| SusE pAMCherry DownR Xba1  | GCATTCTAGACAGCTAACAAAATTATCACCGG                              | SusE C-terminal PAmCherry fusion |
| SusE pAMCherry DownR nest  | CGGTGCAAATTCACCTG                                             | SusE C-terminal PAmCherry fusion |
| SusF pAMCherry Up nest     | GCATCACCTTGACGCTGCC                                           | SusF C-terminal PAmCherry fusion |
| SusF pAMCherry Up Sal1     | GCATGTCGACCGGTGATAATTTTGTAGCTGG                               | SusF C-terminal PAmCherry fusion |
| SusF pAMCherry UpR         | GCGCATGAACTCCTTAATGATGGCTGCTGCTTCGATACGGCC<br>TGTTCCGTTGC     | SusF C-terminal PAmCherry fusion |
| pAMCherry SusF F           | GCAACGGAACAGGCCGTATCGAAGCAGCAGCAGCCATCATTAAAG<br>GAGTTCATGCGC | SusF C-terminal PAmCherry fusion |
| pAMCherry SusF R           | CCTTGATTTCTTGTAGTACTTGTACAGCTCGTCCATG                         | SusF C-terminal PAmCherry fusion |
| SusF pAMCherry DownF       | CATGGACGAGCTGTACAAGTAATACTACAAGAAATCAAGG                      | SusF C-terminal PAmCherry fusion |
| SusF pAMCherry Down R Xba1 | GCATTCTAGACCTTTCACGGCAGCGGTC                                  | SusF C-terminal PAmCherry fusion |
| SusF pAMCherry Down nest   | GGAAGAGGCGCCGATTTTTG                                          | SusF C-terminal PAmCherry fusion |
| HaloTag F                  | AGACCTGGGTTATTTCTTCGAC                                        | HaloTag C terminal fusion        |

| Primer Name                    | SEQUENCE (5'-3')                                    | Used for Construction of      |
|--------------------------------|-----------------------------------------------------|-------------------------------|
| HaloTag R                      | GTCGAAGAAATAACCCAGGTCT                              | HaloTag C terminal fusion     |
| SusG-PAmCherry UpF<br>Sall     | GCATGTCGACCAAGGAAACAGGGAATGGCCGTCGC                 | CBM58 swap with<br>PAmCherry  |
| SusG-PAmCherry UpR             | GCTGCTGCATTGCCTGAGCCTGTACGGCAGCGGTCTCGTCAG          | CBM58 swap with<br>PAmCherry  |
| SusG-PAmCherry<br>DownF        | CAGCAGCAGGCAGCAACGGCGCGAACGGCCAGATCACCTATTTCCATTCTC | CBM58 swap with<br>PAmCherry  |
| SusG-PAmCherry<br>DownR Xbal   | GCATTCTAGAGTGAATGGGTATCGGCTTGTGG                    | CBM58 swap with<br>PAmCherry  |
| PAmCherry SusG F               | CAGGCTCAGGCAATGCAGCAGCAGCCATCATTAAAGG               | CBM58 swap with<br>PAmCherry  |
| PAmCherry SusG R               | GTTGCTGCCTGCTGCTGCCTGTACAGCTCGTCCATG                | CBM58 swap with<br>PAmCherry  |
| PAmCherry-SusG F               | CGCTGCCGTGACAGGCTCAGGCAATGCAGCAGCAGCCATCATTAG       | CBM58 swap with<br>PAmCherry  |
| PAmCherry-SusG R               | CTGGCCGTTGCGCCGTTGCTGCCTGCTGCCTGTACAGCTCGTCC        | CBM58 swap with<br>PAmCherry  |
| SusG-PAmCherry-pX<br>R         | ATTGCCTGAGCCTGTACGGCAGCGG                           | CBM58 swap with<br>PAmCherry  |
| SusG-PAmCherry-pX<br>F         | GGCAGCAACGGCGCGAACGG                                | CBM58 swap with<br>PAmCherry  |
| SusE-PAmCherry<br>D*dFG DownF  | GACGAGCTGTACAAGTAATTAACCTTAAAAAGAACGATTCATC         | SusD* E-PAmCherry ΔFG         |
| SusE-PAmCherry<br>D*dFG DownR  | GGCGGCCGCTCTAGAGAATGCGGAGTGATTATTC                  | SusD* E-PAmCherry ΔFG         |
| SusE-PAmCherry-pX<br>R         | TTACTTGACAGCTCGTCC                                  | SusD* E-PAmCherry ΔFG         |
| SusE-PAmCherry-pX F            | TCTAGAGCGGCCGCCAC                                   | SusD* E-PAmCherry ΔFG         |
| SusG-PAmCherry pX<br>NT swap F | TGGACCGCACTTACCGCC                                  | SusE-Nterm-SusG-<br>PAmCherry |
| SusG-PAmCherry pX<br>NT swap R | AATGATGATGTATTAAGAC                                 | SusE-Nterm-SusG-<br>PAmCherry |
| SusE NT F                      | TGTCTTAATACATCATCATTATGAAAAAATATCCAACATATTAC        | SusE-Nterm-SusG-<br>PAmCherry |
| SusE NT R                      | CGGTAAGTGCGGTCCAGTTCAGGATCGGATTGCTG                 | SusE-Nterm-SusG-<br>PAmCherry |

**Table S3.** Whole membrane proteomics. (Attached separately)

**Table S4.** Co-IP proteomics. (Attached separately)
